# Supplementary material for: Associations of Leukocyte Telomere Length With Aerobic and Muscular Fitness in Young Adults
Source: PubMed Central journal article supplement (PMC5860435; doi:10.1093/aje/kww123), 2017-03-01
Supplement: kww123williamswebmaterialfinal.pdf [file kww123williamswebmaterialfinal.pdf]

**Web Table 1.** Univariable trends in participant characteristics by fifths of the LTL distribution

|                                                                      | Lowest Fifth |                | 2nd Fifth    |                | 3rd Fifth     |                | 4th Fifth     |                | Highest Fifth |                | P Value** |
|----------------------------------------------------------------------|--------------|----------------|--------------|----------------|---------------|----------------|---------------|----------------|---------------|----------------|-----------|
|                                                                      | <0.87        |                | 0.87 to 1.05 |                | >1.05 to 1.24 |                | >1.24 to 1.51 |                | >1.51         |                |           |
| Age (years)                                                          | 31.18        | (31.15, 31.20) | 31.17        | (31.15, 31.20) | 31.14         | (31.11, 31.17) | 31.14         | (31.12, 31.17) | 31.12         | (31.09, 31.15) | <0.001    |
| Sex (% female)                                                       | 47.3         | (44.3, 50.3)   | 49.0         | (46.0, 52.0)   | 52.2          | (49.2, 55.2)   | 52.8          | (49.8, 55.8)   | 57.4          | (54.4, 60.3)   | <0.001    |
| BMI (kg/m <sup>2</sup> )*                                            | 24.7         | (24.4, 24.9)   | 24.6         | (24.3, 24.8)   | 24.6          | (24.4, 24.8)   | 24.0          | (23.8, 24.3)   | 23.9          | (23.7, 24.2)   | <0.001    |
| Socioeconomic position (%)                                           |              |                |              |                |               |                |               |                |               |                | 0.14      |
| Farmer                                                               | 2.7          | (1.9, 3.9)     | 4.6          | (3.5, 6.1)     | 3.8           | (2.8, 5.1)     | 3.7           | (2.7, 5.0)     | 4.0           | (3.0, 5.3)     |           |
| Professional                                                         | 25.2         | (22.6, 27.9)   | 22.5         | (20.1, 25.1)   | 25.5          | (23.0, 28.3)   | 23.9          | (21.5, 26.6)   | 22.3          | (19.8, 24.9)   |           |
| Skilled worker                                                       | 29.6         | (26.9, 32.4)   | 30.0         | (27.3, 32.8)   | 31.5          | (28.8, 34.4)   | 28.9          | (26.3, 31.8)   | 33.5          | (30.7, 36.4)   |           |
| Unskilled worker                                                     | 27.7         | (25.1, 30.5)   | 26.8         | (24.2, 29.5)   | 24.2          | (21.7, 26.9)   | 26.1          | (23.6, 28.8)   | 23.5          | (21, 26.1)     |           |
| Other                                                                | 14.8         | (12.7, 17)     | 16.1         | (14, 18.4)     | 14.9          | (12.9, 17.2)   | 17.3          | (15.1, 19.7)   | 16.8          | (14.6, 19.1)   |           |
| Physical activity (MET-hours/week)*                                  | 9.7          | (9.0, 10.5)    | 9.7          | (9.0, 10.5)    | 10.2          | (9.4, 11.0)    | 9.8           | (9.1, 10.6)    | 10.5          | (9.7, 11.3)    | 0.23      |
| Diet quality (% per category)                                        |              |                |              |                |               |                |               |                |               |                | 0.02      |
| 0                                                                    | 6.0          | (4.7, 7.6)     | 6.4          | (5.1, 8.1)     | 8.1           | (6.6, 9.9)     | 9.2           | (7.6, 11.1)    | 7.8           | (6.3, 9.5)     |           |
| 1                                                                    | 22.3         | (19.9, 24.9)   | 22.6         | (20.2, 25.2)   | 25.4          | (22.9, 28.2)   | 24.8          | (22.3, 27.5)   | 26.2          | (23.7, 29)     |           |
| 2                                                                    | 30.2         | (27.5, 33)     | 31.7         | (29, 34.6)     | 30.5          | (27.8, 33.3)   | 28.9          | (26.2, 31.7)   | 29.6          | (27, 32.5)     |           |
| 3                                                                    | 30.8         | (28.1, 33.7)   | 26.9         | (24.3, 29.6)   | 23.8          | (21.4, 26.5)   | 25.2          | (22.6, 27.9)   | 26.2          | (23.7, 29)     |           |
| 4 or 5                                                               | 10.7         | (9, 12.7)      | 12.4         | (10.5, 14.5)   | 12.1          | (10.3, 14.2)   | 12.0          | (10.2, 14.1)   | 10.1          | (8.5, 12.1)    |           |
| Ever smoker (%)                                                      | 64.1         | (61.2, 67.0)   | 66.1         | (63.2, 68.9)   | 62.3          | (59.4, 65.2)   | 63.0          | (60.1, 65.9)   | 61.2          | (58.2, 64.1)   | 0.06      |
| Cigarette consumption per day (% non-smokers, or per tertile of use) |              |                |              |                |               |                |               |                |               |                | 0.10      |
| none                                                                 | 62.2         | (59.2, 65)     | 62.1         | (59.1, 64.9)   | 62.5          | (59.6, 65.4)   | 65.2          | (62.3, 68)     | 66.8          | (63.9, 69.5)   |           |
| 1st tertile                                                          | 11.7         | (9.9, 13.8)    | 11.7         | (9.9, 13.8)    | 12.7          | (10.8, 14.8)   | 13.5          | (11.6, 15.7)   | 12.6          | (10.7, 14.7)   |           |
| 2nd tertile                                                          | 14.9         | (12.8, 17.1)   | 14.2         | (12.2, 16.4)   | 13.8          | (11.9, 16)     | 11.6          | (9.8, 13.7)    | 12.1          | (10.3, 14.2)   |           |
| 3rd tertile                                                          | 11.3         | (9.5, 13.3)    | 12.0         | (10.2, 14.1)   | 11.0          | (9.2, 13)      | 9.7           | (8, 11.6)      | 8.5           | (7, 10.4)      |           |

|                                   |       |                |       |                |       |                |       |                |       |                |        |
|-----------------------------------|-------|----------------|-------|----------------|-------|----------------|-------|----------------|-------|----------------|--------|
| Alternate tobacco use (%)         | 4.6   | (3.5, 6.1)     | 3.3   | (2.4, 4.6)     | 3.0   | (2.1, 4.2)     | 3.2   | (2.3, 4.5)     | 2.7   | (1.9, 3.9)     | 0.03   |
| Alcohol consumption (g/day)*      | 4.6   | (4.2, 5.1)     | 5.2   | (4.7, 5.7)     | 4.5   | (4.1, 5)       | 4.2   | (3.8, 4.6)     | 3.8   | (3.4, 4.2)     | 0.03   |
| CRP (mg/L)*                       | 0.87  | (0.79, 0.95)   | 0.86  | (0.78, 0.94)   | 0.82  | (0.75, 0.9)    | 0.68  | (0.62, 0.74)   | 0.66  | (0.60, 0.73)   | <0.001 |
| Step test (BPM)                   | 148.9 | (147.7, 150.0) | 148.9 | (147.8, 150.1) | 148.3 | (147.2, 149.4) | 147.5 | (146.3, 148.6) | 147.4 | (146.2, 148.5) | 0.002  |
| Hand grip strength (kg)           |       |                |       |                |       |                |       |                |       |                |        |
| Male                              | 49.8  | (49.0, 50.7)   | 49.5  | (48.7, 50.3)   | 50.2  | (49.3, 51.0)   | 49.3  | (48.5, 50.2)   | 48.9  | (48.0, 49.8)   | 0.13   |
| Female                            | 28.0  | (27.4, 28.6)   | 28.5  | (27.9, 29)     | 28.0  | (27.4, 28.5)   | 28.2  | (27.6, 28.8)   | 28.1  | (27.6, 28.7)   | 0.93   |
| Trunk muscle endurance (seconds)* | 153.0 | (148.7, 157.3) | 156.7 | (152.5, 161.1) | 161.7 | (157.3, 166.2) | 165.2 | (160.7, 169.8) | 162.3 | (157.9, 166.8) | 0.001  |

BMI: body mass index; BPM: beats per minute; CRP: C-reactive protein; MET: metabolic equivalent of task.

\* Log<sub>n</sub>-transformed variables used for tests of trends across fifths of LTL, due to non-normal distributions of original variables.

\*\* *P* values are from linear or logistic regression across fifths of TS ratio, or  $\chi^2$  tests for categorical variables.

**Web Table 2.** Associations of LTL with aerobic fitness, excluding those with extreme LTL outlying values ( $n = 4,903$ )†

|         | $\beta^*$ | 95% CI     | P Value |
|---------|-----------|------------|---------|
| Model 1 | -2.3      | -3.8, -0.9 | 0.002   |
| Model 2 | -1.7      | -3.1, -0.3 | 0.02    |
| Model 3 | -1.6      | -3.0, -0.2 | 0.03    |
| Model 4 | -1.7      | -3.0, -0.3 | 0.02    |

† Participants with LTL values  $\geq 3$  SD from the mean of  $\log_n$ -transformed LTL distribution were excluded ( $n = 49$ ).

\*  $\beta$ 's represent average difference in heart rate per one SD increase in mean relative LTL (lower heart rates indicating higher aerobic fitness).

Model 1—adjusted for age, sex and LTL batch.

Model 2—as model 1 plus BMI, SEP, physical activity, diet quality, smoking status, and alcohol consumption.

Model 3—as model 2 plus CRP.

Model 4—as model 2 plus physical activity.

**Web Table 3.** Associations of LTL with handgrip strength (stratified by sex) and trunk muscle endurance (not stratified), excluding those with extreme LTL outlying values†

|         | Handgrip in Males<br>( <i>n</i> = 2,482) |           |          | Handgrip in Females<br>( <i>n</i> = 2,672) |           |          | Trunk Muscle Endurance<br>( <i>n</i> = 4,916) |            |          |
|---------|------------------------------------------|-----------|----------|--------------------------------------------|-----------|----------|-----------------------------------------------|------------|----------|
|         | $\beta^*$                                | 95% CI    | <i>P</i> | $\beta^*$                                  | 95% CI    | <i>P</i> | Hazard Ratio**                                | 95% CI     | <i>P</i> |
| Model 1 | -0.3                                     | -0.6, 0.1 | 0.15     | 0.1                                        | -0.2, 0.3 | 0.61     | 0.94                                          | 0.90, 0.97 | <0.001   |
| Model 2 | -0.2                                     | -0.5, 0.2 | 0.32     | 0.1                                        | -0.2, 0.3 | 0.47     | 0.97                                          | 0.94, 1.00 | 0.05     |
| Model 3 | -0.2                                     | -0.5, 0.2 | 0.27     | 0.1                                        | -0.2, 0.3 | 0.61     | 0.97                                          | 0.94, 1.00 | 0.08     |
| Model 4 | -0.2                                     | -0.5, 0.2 | 0.31     | 0.1                                        | -0.2, 0.3 | 0.47     | 0.97                                          | 0.94, 1.00 | 0.07     |

CI, confidence interval.

† Participants with LTL values  $\geq 3SD$  from the mean of  $\log_n$ -transformed LTL distribution were excluded (*n* = 51 for handgrip analyses; *n* = 48 for trunk muscle endurance analyses).

\*  $\beta$ 's represent average difference in handgrip strength (kg) per one SD increase in  $\log_n$ -transformed LTL.

\*\* Hazard ratios represent difference in the chances of failing to complete the trunk muscle endurance test per one SD increase in  $\log_n$ -transformed LTL (i.e. lower ratios are indicative of higher trunk muscle endurance).

Model 1—adjusted for age and LTL batch (plus sex in the trunk muscle endurance analysis).

Model 2—as model 1 plus BMI, SEP, physical activity, diet quality, smoking status, and alcohol consumption.

Model 3—as model 2 plus CRP.

Model 4—as model 2 plus physical activity.

**Web Table 4.** Associations of LTL with aerobic fitness in a subset of participants with information on all physical fitness measures ( $n = 4,733$ )

|         | $\beta$ | 95% CI      | <i>P</i> Value |
|---------|---------|-------------|----------------|
| Model 1 | -0.8    | -1.3, -0.3  | 0.002          |
| Model 2 | -0.6    | -1.1, -0.1  | 0.02           |
| Model 3 | -0.5    | -1.0, -0.02 | 0.04           |
| Model 4 | -0.5    | -1.0, -0.04 | 0.04           |

CI, confidence interval.

\*  $\beta$ 's represent average difference in heart rate per per one SD increase in mean relative LTL (lower heart rates indicating higher aerobic fitness).

Model 1—adjusted for age, sex and LTL batch.

Model 2—as model 1 plus BMI, SEP, physical activity, diet quality, smoking status, and alcohol consumption.

Model 3—as model 2 plus CRP.

Model 4—as model 2 plus handgrip strength and trunk muscle endurance.

**Web Table 5.** Associations of LTL with trunk muscle endurance in a subset of participants with information on all physical performance measures ( $n = 4,733$ )

|         | <b>Hazard Ratio*</b> | <b>95% CI</b> | <b>P Value</b> |
|---------|----------------------|---------------|----------------|
| Model 1 | 0.93                 | 0.90, 0.96    | <0.001         |
| Model 2 | 0.96                 | 0.93, 0.99    | 0.01           |
| Model 3 | 0.96                 | 0.94, 0.99    | 0.02           |
| Model 4 | 0.96                 | 0.94, 0.99    | 0.02           |

CI, confidence interval.

\* Hazard ratios represent difference in the chances of failing to complete the trunk muscle endurance test per one SD increase in  $\log_n$ -transformed LTL (i.e. lower ratios are indicative of higher trunk muscle endurance).

Model 1—adjusted for age, sex and LTL batch.

Model 2—as model 1 plus BMI, SEP, physical activity, diet quality, smoking status, and alcohol consumption.

Model 3—as model 2 plus CRP.

Model 4—as model 2 plus aerobic fitness and handgrip strength.
